# Supplementary material for: Sall4 regulates posterior trunk mesoderm development by promoting mesodermal gene expression and repressing neural genes in the mesoderm
Source: PubMed Central journal article supplement (PMC10946440; doi:10.1242/dev.202649), 2024-03-04
Supplement: develop-151-202649-s1.pdf [file develop-151-202649-s1.pdf]

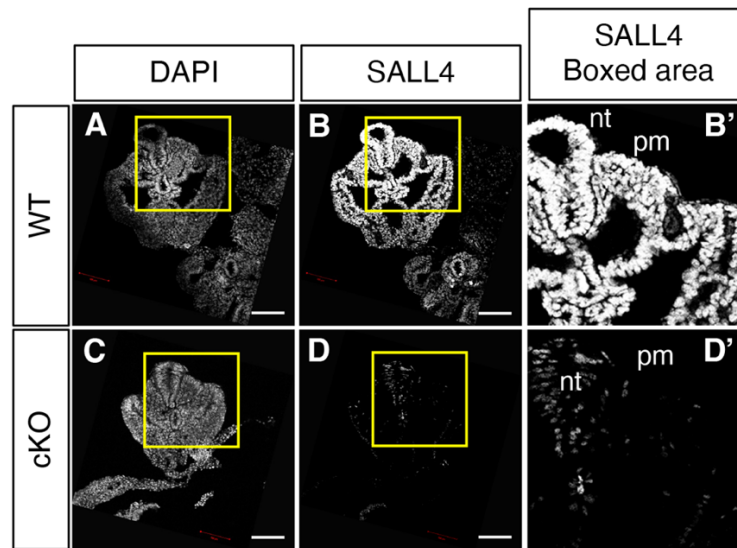

**Fig. S1. SALL4 immunofluorescence on WT and *Sall4* cKO embryos**

Confocal images after SALL4 immunofluorescence on cross sections of the posterior trunk of WT (A-B', n=17) and *Sall4* cKO (C-D', n=23) embryos at E9.5. DAPI signals (A, C) and SALL4 signals (B, B', D, D') are shown in a black/white mode. B' and D' show the boxed areas in B and D, respectively. With the settings to detect residual SALL4 immunoreactivity in *Sall4* cKO sections, the SALL4 signals in the WT embryos were essentially saturated. nt: neural tube, pm: paraxial mesoderm. Scale bar, 100  $\mu$ m.

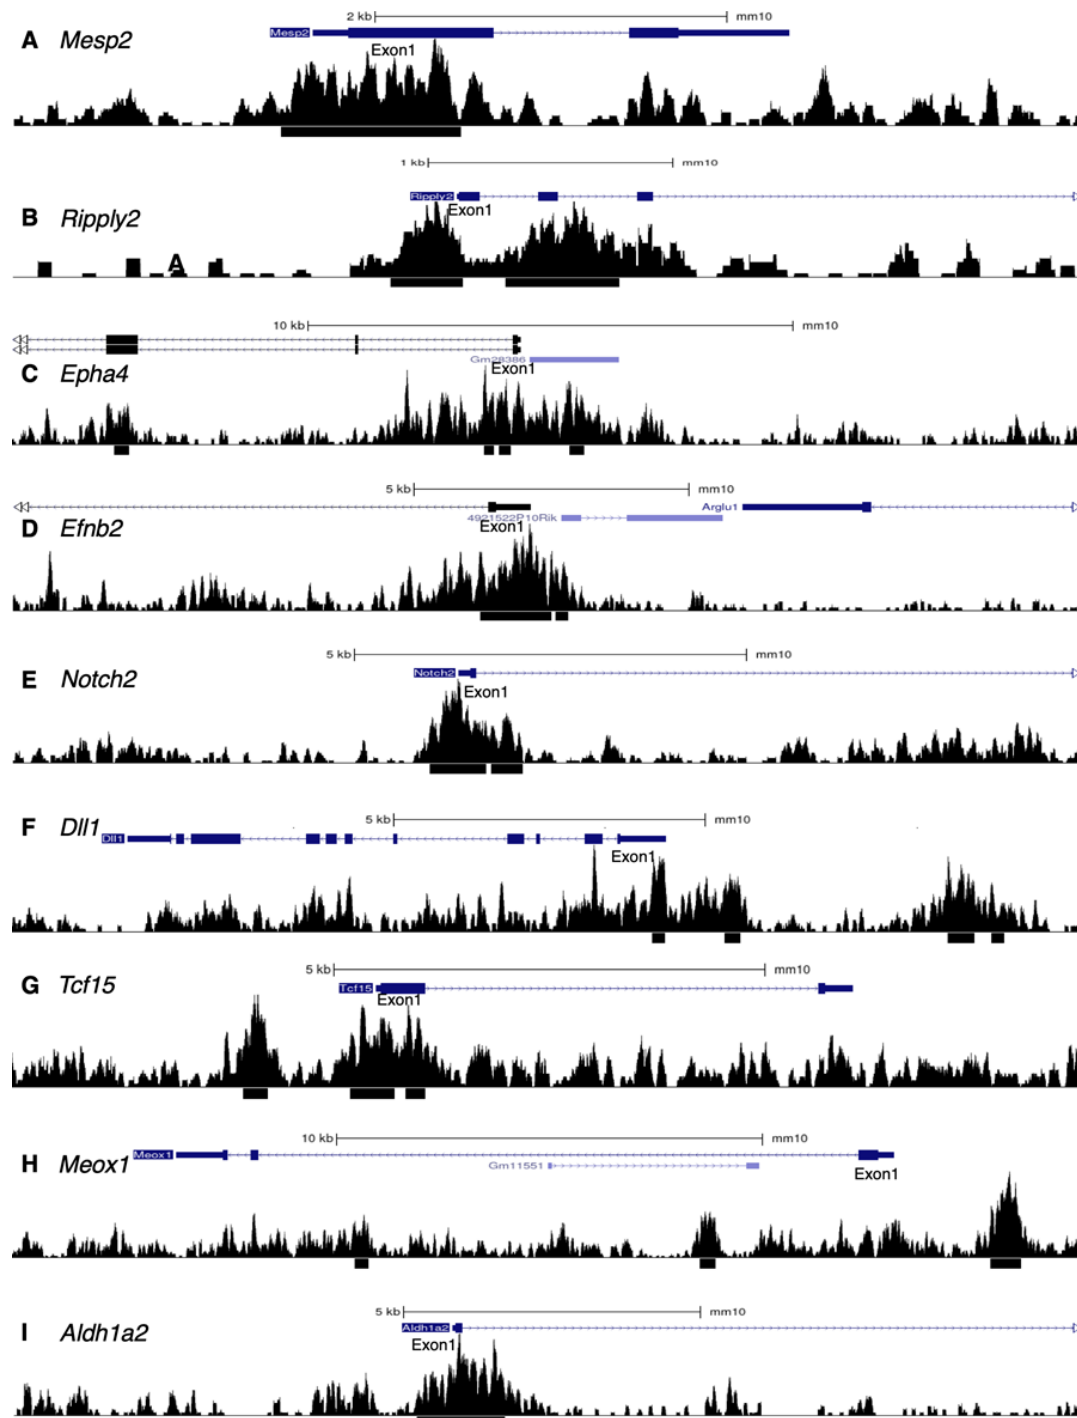

**Fig. S2. SALL4 ChIP-seq tracks of genes expressed in PM**

SALL4 ChIP-seq tracks of *Mesp2* (A), *Ripply2* (B), *Epha4* (C), *Efnb2* (D), *Notch2* (E), *Dll1* (F), *Tcf15* (G), *Meox1* (H) and *Aldh1a2* (I). Black bars under the track indicate statistically significant SALL4 enrichment.

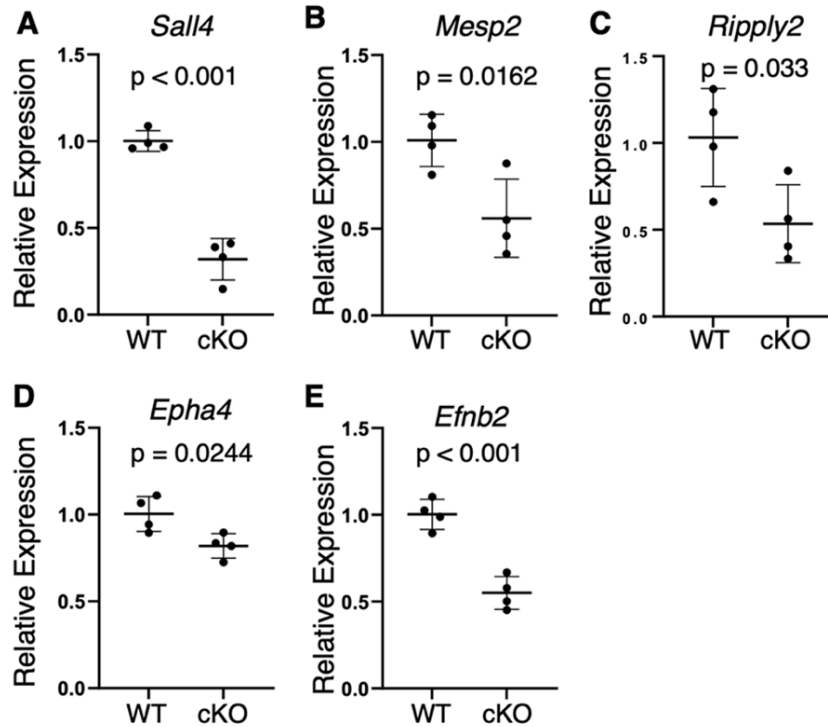

**Fig. S3. Gene expression in E8.5 trunk between WT and *Sall4* cKO**

Relative expression of *Sall4* (A), *Mesp2* (B), *Ripply2* (C), *Epha4* (D) and *Efnb2* (F) in the trunk of E8.5 WT and *Sall4* cKO embryos.

Each dot represents an embryo. Eight to ten somite stage embryos were used. P values by unpaired t-test are shown in each panel.

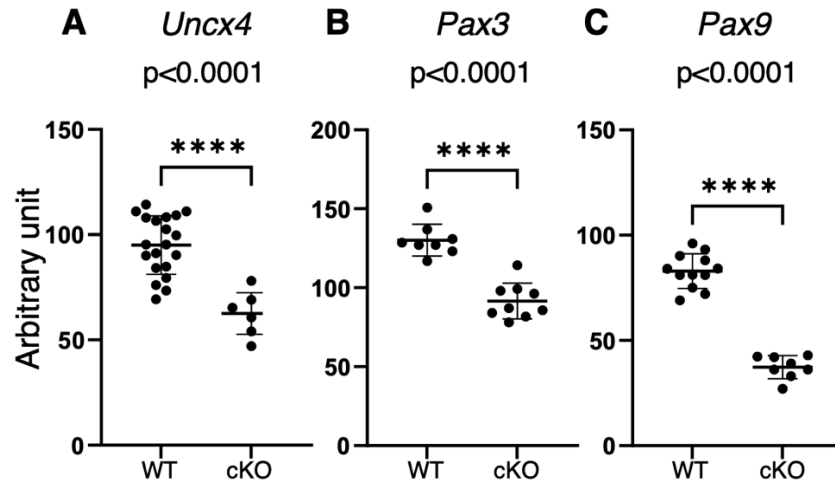

**Fig. S4. Measurement of the width of the most posterior expression domains of *Uncx4* (A), *Pax3* (B), and *Pax9* (C) in WT and *Sall4* cKO embryos at E9.5**

Dorsal viewed images were imported into FIJI, and the width of the most posterior expression domain was measured. Each dot represents a somite, and p values by unpaired t-test are shown in each panel.

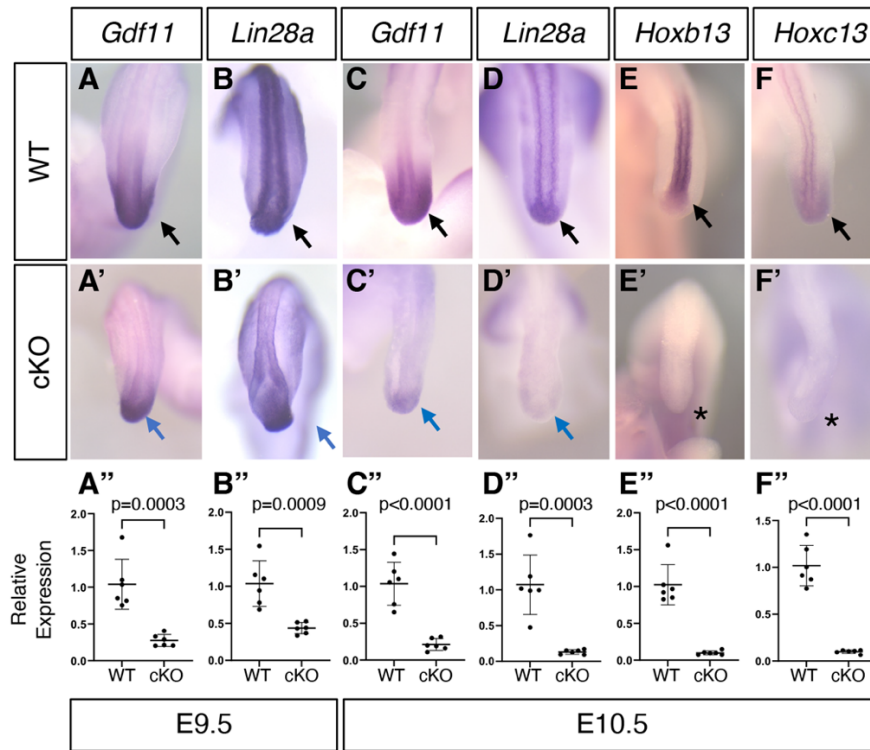

**Fig. S5. Analysis of gene expression involved in trunk-tail transition**

(A-F'') Dorsal views of the posterior part of WT and *Sall4* cKO embryos hybridized with *Gdf11* (A, A', C, C'), *Lin28a* (B, B', D, D'), *Hoxb13* (E, E') and *Hoxc13* (F, F') probes. E9.5 (A-B') and E10.5 (C-F') embryos are shown. Black arrows and blue arrows point to normal and reduced expression, respectively. Asterisks indicate lack of expression.

(A''-F'') Relative expression levels of *Gdf11* (A'', C''), *Lin28a* (B'', D''), *Hoxb13* (E'') and *Hoxc13* (F'') at E9.5 (A'', B'') and E10.5 (C''-F'') are shown. Each dot represents an embryo, and p values by unpaired t-test are shown in each panel.

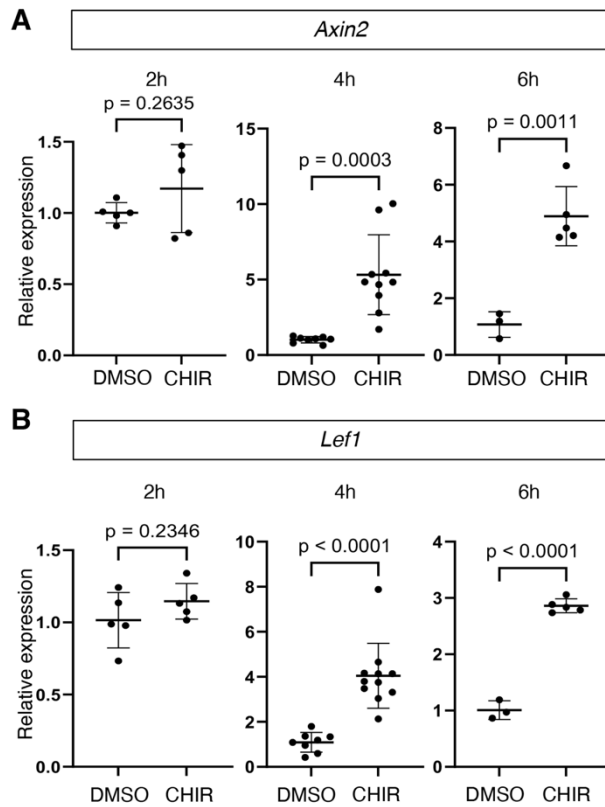

**Fig. S6. Expression of *Axin2* and *Lef1* in the E10.5 tail culture experiments**

Relative expression levels of *Axin2* (A) and *Lef1* (B) after culturing the tail for indicated times (2, 4, or 6 hours) with CHIR, compared to DMSO.

Each dot represents a tail, and p values by unpaired t-test are shown in each panel.

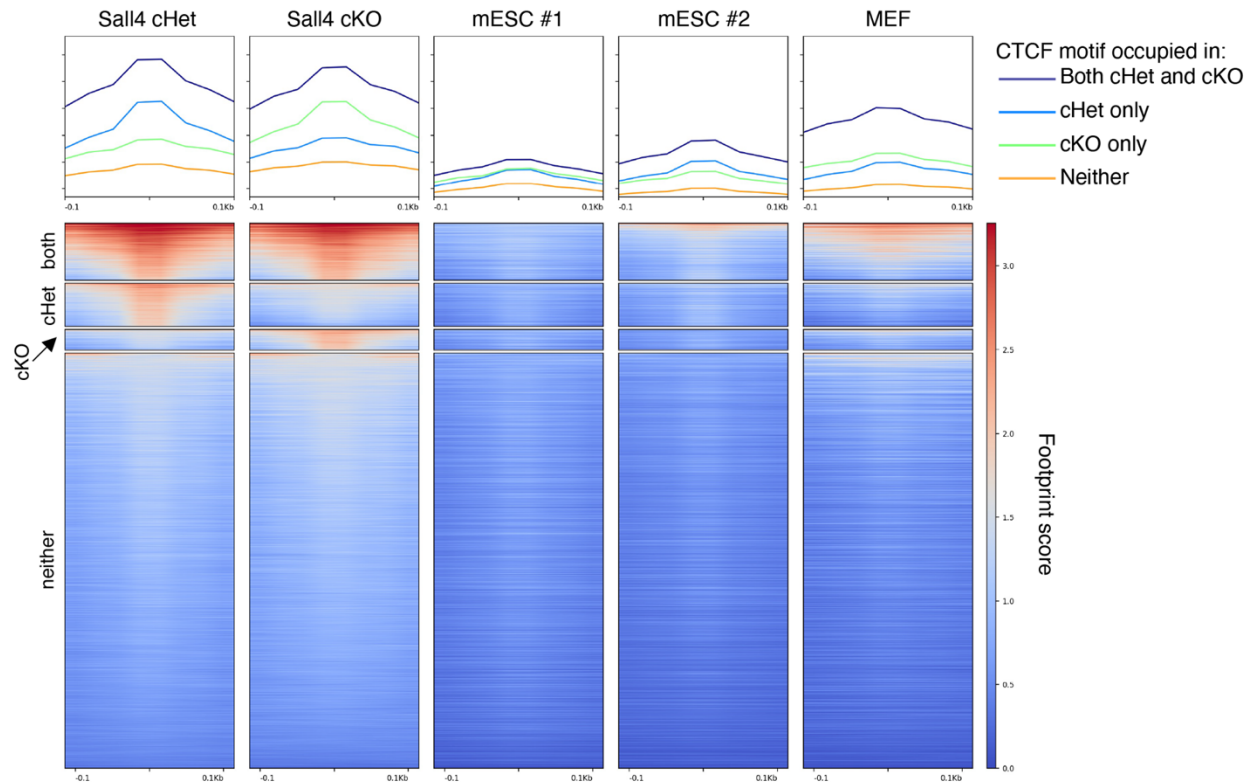

**Fig. S7. Heatmap of ATAC-seq data after TOBAIS analysis**

Heat map of the CTCF motifs in the *Sall4* cHet posterior trunk, *Sall4* cKO posterior trunk, WT mouse embryonic stem cells in two independent studies (mESC #1 and #2) and WT mouse embryonic fibroblasts (MEF). The x-axis corresponds to  $\pm 100$  base pairs from the center of accessible regions (shown as 0). The *Sall4* cHet and *Sall4* cKO heatmaps are the same as Fig. 6C.

**Table S1.** Genomic regions with enriched SALL4 binding in the posterior trunk mesoderm

Available for download at

<https://journals.biologists.com/dev/article-lookup/doi/10.1242/dev.202649#supplementary-data>

**Table S2.** Regions with enriched SALL4 binding in and around select genes related to this study

Available for download at

<https://journals.biologists.com/dev/article-lookup/doi/10.1242/dev.202649#supplementary-data>

**Table S3.** Differentially accessible regions between *Sall4* cHet and *Sall4* cKO posterior trunk mesoderm

Available for download at

<https://journals.biologists.com/dev/article-lookup/doi/10.1242/dev.202649#supplementary-data>

**Table S4.** Results of gene ontology analysis of genes nearest to differentially accessible regions between *Sall4* cHet and *Sall4* cKO posterior trunk mesoderm

Available for download at

<https://journals.biologists.com/dev/article-lookup/doi/10.1242/dev.202649#supplementary-data>

**Table S5.** Results of gene ontology analysis of differentially expressed genes between WT and *Sall4* cKO posterior trunk tissue

Available for download at

<https://journals.biologists.com/dev/article-lookup/doi/10.1242/dev.202649#supplementary-data>

**Table S6.** CTCF occupancy scores of CTCF binding motifs in *Sall4* cKO and *Sall4* cHet samples from footprinting analysis of ATAC-seq data

Available for download at

<https://journals.biologists.com/dev/article-lookup/doi/10.1242/dev.202649#supplementary-data>

**Table S7.** Results of gene ontology analysis of genes closest to preferentially occupied CTCF sites in *Sall4* cHet relative to *Sall4* cKO posterior trunk mesoderm

Available for download at

<https://journals.biologists.com/dev/article-lookup/doi/10.1242/dev.202649#supplementary-data>



**Table S8.** Primers used for qPCR

| Gene           | Reference sequence | Primers (5'→3')                                  |
|----------------|--------------------|--------------------------------------------------|
| <i>Actb</i>    | NM_007393          | TGTTACCAACTGGGACGACA<br>CTGGGTCATCTTTTCACGGT     |
| <i>Axin2</i>   | NM_015732          | TGACTCTCCTTCCAGATCCCA<br>TGCCACACTAGGCTGACA      |
| <i>Efnb2</i>   | NM_010111          | ATTATTTGCCCAAAGTGGACTC<br>GCAGCGGGGTATTCTCCTTC   |
| <i>Epha4</i>   | NM_007936          | TGGAATTTGCGACGCTGTCA<br>CACTTCCTCCCACCCTCCTT     |
| <i>Gdf11</i>   | NM_010272          | CCGGCGTCACATCCGTATC<br>ACTTGCTTGAAGTCGATGCTC     |
| <i>Hoxb13</i>  | NM_008267          | TCTTGCCGAGTATCCAGGAG<br>GGAGTTTCCGAAGGGTAGGTAG   |
| <i>Hoxc13</i>  | NM_010464          | GCCGTCTACACGGACATCC<br>CCCCAAATGGGTAACCATAGC     |
| <i>Lef1</i>    | NM_010703          | GCCACCGATGAGATGATCCC<br>TTGATGTCGGCTAAGTCGCC     |
| <i>Lin28a</i>  | NM_145833          | TGGTGTGTTCTGTATTGGGAGT<br>AGTTGTAGCACCTGTCTCCTTT |
| <i>Mesp2</i>   | NM_008589          | CGGCGTTCTCTACCGATG<br>CACCCCACTACTCATGGCTG       |
| <i>Msgn1</i>   | NM_019544          | CTTCTGACACCGCTGGTCTG<br>GTGACTGCCGTAGCCATCG      |
| <i>Ripply2</i> | NM_001379243       | CCTGGAGAGAAAGAGAAGCG<br>ATAGCCTGACAGGGTGTGG      |
| <i>Tbx6</i>    | NM_011538          | ATGTACCATCCACGAGAGTTGT<br>GGTAGCGGTAACCCTCTGTC   |
| <i>Tcf15</i>   | NM_009328          | GTGTAAGGACCGGAGGACAA<br>GATGGCTAGATGGGTCCTTG     |
